# Supplementary material
Source: PubMed Central journal article supplement (PMC2876956)
Supplement: emboj201031s2.pdf [file emboj201031s2.pdf]

Manuscript EMBO-2009-73453

## **Regulation of natural killer T-cell development by deubiquitinase CYLD**

Andrew J.Lee, Xiaofei Zhou, Mikyoung Chang, John Hunzeker, Robert Bonneau, Dapeng Zhou, Shao-Cong Sun

*Corresponding author: Shao-Cong Sun, University of Texas MD Anderson Cancer Center*

---

**Review timeline:**

Submission date:

17 December 2009

Accepted:

16 February 2010

---

**No Review Process File is available with this article, as the authors have chosen not to make the review process public in this case.**
